# Supplementary material
Source: PubMed Central journal article supplement (PMC1691692)
Supplement: 15293857s01.pdf [file 15293857s01.pdf]

Electronic appendices are refereed with the text. However, no attempt is made to impose a uniform editorial style on the electronic appendices.

**Electronic Appendix A.** Ecological traits among pairs of species that consisted of island species and their mainland counterparts.

| Species                               | Island   | Family   | Male body mass (g) | Habitat type <sup>1</sup> | Food type <sup>2</sup> | Intra-specific flocking | Density | Nest predation | Mean flock size | Maximum flock size | Mixed-species flocking | References <sup>3</sup>      |
|---------------------------------------|----------|----------|--------------------|---------------------------|------------------------|-------------------------|---------|----------------|-----------------|--------------------|------------------------|------------------------------|
| <i>Anas poecilorhyncha pelewensis</i> | Society  | Anatidae | .                  | Water                     | Plants                 | Present                 | Common  | Present        | 7.5             | 20                 | Absent                 | 1,2,3,4,5,6                  |
| <i>Anas platyrhynchos</i>             | .        | Anatidae | 1246               | Water                     | Mixed                  | Present                 | Common  | .              | 110             | 1000               | Present                | 1,7,8,9                      |
| <i>Anas laysanensis</i>               | Laysan   | Anatidae | 455.9              | Open                      | Insects                | Absent                  | Common  | Rare           | 1               | 2                  | Absent                 | 1,2,10,11,12                 |
| <i>Anas superciliosa rogersi</i>      | .        | Anatidae | 1059               | Open                      | Sseeds-insects         | Present                 | Common  | .              | .               | 1000               | Absent                 | 1,12,13                      |
| <i>Collocalia bartschi</i>            | Guam     | Apodidae | 7.4                | Mixed                     | Insects                | Present                 | Common  | Absent         | .               | 100                | Absent                 | 2,14,15,16,17,18,19,20,21,22 |
| <i>Collocalia terraereginae</i>       | .        | Apodidae | 11.3               | Mixed                     | Insects                | Present                 | Common  | .              | .               | .                  | .                      | 14,15                        |
| <i>Aerodramus elaphra</i>             | Praslin  | Apodidae | 10.7               | Mixed                     | Insects                | Present                 | Common  | Rare           | .               | .                  | Absent                 | 14,15,23,24,25,26,27         |
| <i>Aerodramus fuciphagus</i>          | .        | Apodidae | 10.7               | Mixed                     | Insects                | Present                 | Common  | .              | 30              | 100                | Present                | 3,14,15,25,28,29,30          |
| <i>Zoonavena thomensis</i>            | Sao Tomé | Apodidae | 8                  | Mixed                     | Insects                | Present                 | Common  | .              | 6               | 30                 | Present                | 15,31,32,33,34,35            |
| <i>Zoonavena sylvatica</i>            | .        | Apodidae | 13                 | Mixed                     | Insects                | Present                 | Common  | .              | .               | 50                 | .                      | 15,36                        |

| Species                             | Island    | Family       | Male body mass (g) | Habitat type <sup>1</sup> | Food type <sup>2</sup> | Intra-specific flocking | Density | Nest predation | Mean flock size | Maximum flock size | Mixed-species flocking | References <sup>3</sup>         |
|-------------------------------------|-----------|--------------|--------------------|---------------------------|------------------------|-------------------------|---------|----------------|-----------------|--------------------|------------------------|---------------------------------|
| <i>Charadrius sanctaehelenae</i>    | St-Helena | Charadriidae | .                  | Open                      | Insects                | Absent                  | Low     | Present        | 2               | 2                  | Absent                 | 37,38,39,40,41,42,43            |
| <i>Charadrius pecuarius</i>         | .         | Charadriidae | 34                 | Open                      | Insects                | Present                 | Common  | .              | 3.5             | 270                | Present                | 39,40,44,45,46                  |
| <i>Raphus cucullatus</i>            | Mauritius | Raphidae     | 21200              | Forest                    | Fruits-seeds           | Absent                  | .       | .              | 1               | 1                  | Absent                 | 47,48,49,50                     |
| <i>Goura victoria</i>               | .         | Columbidae   | 2380               | Forest                    | Fruits-seeds           | Present                 | Common  | .              | 2               | 10                 | Absent                 | 47,48,49,50,51,52,53,54         |
| <i>Ducula aurorae</i>               | Society   | Columbidae   | .                  | Forest                    | Fruits                 | Mixed                   | Low     | .              | 1               | 4                  | Absent                 | 2,4,47,52,55,56                 |
| <i>Ducula aenea</i>                 | .         | Columbidae   | 600                | Forest                    | Fruits                 | Present                 | Common  | .              | 1               | 60                 | Absent                 | 3,30,36,47,52,57                |
| <i>Ptilinopus roseicapilla</i>      | Saipan    | Columbidae   | 92                 | Forest                    | Fruits                 | Mixed                   | Common  | Present        | 1               | 12                 | Absent                 | 2,16,17,18,19,20,21,22,47,52,58 |
| <i>Ptilinopus magnificus</i>        | .         | Columbidae   | 480                | Forest                    | Fruits                 | Mixed                   | Common  | .              | 1               | 6                  | Absent                 | 47,51,52,53,59                  |
| <i>Dicunculus strigirostris</i>     | Samoa     | Columbidae   | 400                | Forest                    | Fruits                 | Present                 | Low     | Present        | .               | 20                 | Absent                 | 2,47,48,50,52,60,61,62,63       |
| <i>Treron waalia</i>                | .         | Columbidae   | 260                | Forest                    | Fruits                 | Present                 | Common  | .              | .               | 50                 | Present                | 3,44,46,47,48,50,52             |
| <i>Gallicolumba xanthonura</i>      | Saipan    | Columbidae   | 128.7              | Forest-plantation         | Fruits                 | Absent                  | Common  | Present        | 1               | 2                  | Absent                 | 2,16,17,18,19,20,21,47,48,58    |
| <i>Geopelia cuneata</i>             | .         | Columbidae   | 33.5               | Open                      | Seeds                  | Present                 | Common  | .              | 25              | 60                 | Present                | 47,48,59                        |
| <i>Alectroenas pulcherrima</i>      | Praslin   | Columbidae   | 165                | Forest                    | Fruits                 | Present                 | Low     | Present        | 2               | .                  | Absent                 | 3,23,24,26,27,47,52,64          |
| <i>Alectroenas madagascariensis</i> | .         | Columbidae   | .                  | Forest                    | Fruits                 | Present                 | Common  | .              | 2               | 13                 | Absent                 | 24,47,65,66                     |

| Species                          | Island         | Family       | Male body mass (g) | Habitat type <sup>1</sup> | Food type <sup>2</sup> | Intra-specific flocking | Density | Nest predation | Mean flock size | Maximum flock size | Mixed-species flocking | References <sup>3</sup>       |
|----------------------------------|----------------|--------------|--------------------|---------------------------|------------------------|-------------------------|---------|----------------|-----------------|--------------------|------------------------|-------------------------------|
| <i>Columba malherbii</i>         | Principe       | Columbidae   | .                  | Forest                    | Fruits                 | Present                 | Common  | .              | .               | 24                 | .                      | 31,32,34,35,44,47,52,67,68    |
| <i>Columba iriditorques</i>      | .              | Columbidae   | 130                | Forest                    | Fruits                 | Present                 | Common  | .              | 2               | 4                  | Present                | 3,34,44,47,52,69              |
| <i>Columba thomensis</i>         | Sao Tomé       | Columbidae   | 525                | Forest                    | Fruits                 | Present                 | Common  | .              | .               | .                  | .                      | 31,32,34,35,44,47,52,68,69,70 |
| <i>Columba arquatrix</i>         | .              | Columbidae   | 349                | Forest                    | Fruits-insects         | Present                 | Common  | .              | .               | 10                 | Present                | 44,47,52,69                   |
| <i>Corvus kubaryi</i>            | Guam           | Corvidae     | .                  | Mixed                     | Mixed                  | Present                 | Low     | Present        | 2               | 26                 | Absent                 | 16,21,71,72,73,74,75,76,77    |
| <i>Corvus macrorhynchos</i>      | .              | Corvidae     | 550                | Mixed                     | Mixed                  | Present                 | Common  | .              | 2               | .                  | .                      | 71,77,78                      |
| <i>Mohoua albicilla</i>          | Little Barrier | Corvidae     | 18                 | Forest                    | Insects-seeds          | Present                 | Common  | Present        | 15              | 30                 | Present                | 79,80,81,82,83,84,85,86       |
| <i>Falcunculus frontatus</i>     | .              | Corvidae     | 30.5               | Forest                    | Insects-seeds          | Present                 | Common  | .              | 4               | 14                 | Present                | 80,87                         |
| <i>Rhipidura fuliginosa</i>      | Little Barrier | Corvidae     | .                  | Forest                    | Insects                | Absent                  | Common  | Present        | 2               | 30                 | Present                | 79,86                         |
| <i>Rhipidura fuliginosa</i>      | .              | Corvidae     | 7.95               | Forest                    | Insects                | Absent                  | Common  | .              | 2               | .                  | Present                | 81,87,88,89,90                |
| <i>Terpsiphone atrochalybeia</i> | Sao Tomé       | Corvidae     | 12.2               | Mixed                     | Insects                | Absent                  | Common  | .              | 2               | .                  | Present                | 31,32,34,35,68,91,92          |
| <i>Terpsiphone viridis</i>       | .              | Corvidae     | 15                 | Mixed                     | Insects                | Absent                  | Common  | .              | 2               | .                  | Present                | 34,91                         |
| <i>Telospiza cantans</i>         | Laysan         | Fringillidae | 34.4               | Open                      | Seeds-insects          | Absent                  | Common  | Absent         | 1               | 1                  | Absent                 | 93,94,95                      |

| Species                               | Island   | Family       | Male body mass (g) | Habitat type <sup>1</sup> | Food type <sup>2</sup> | Intra-specific flocking | Density | Nest predation | Mean flock size | Maximum flock size | Mixed-species flocking | References <sup>3</sup>             |
|---------------------------------------|----------|--------------|--------------------|---------------------------|------------------------|-------------------------|---------|----------------|-----------------|--------------------|------------------------|-------------------------------------|
| <i>Loxia curvirostra</i>              | .        | Fringillidae | 33.85              | Forest                    | Seeds                  | Present                 | Common  | .              | 3               | 100                | Present                | 94,95,96,97,98,99,100,101           |
| <i>Mniotilta varia</i>                | Virgin   | Fringillidae | 12                 | Forest                    | Insects                | Present                 | Common  | Present        | 4               | .                  | Present                | 102,103,104,105,106,107,108         |
| <i>Mniotilta varia</i>                | .        | Fringillidae | 12                 | Forest                    | Insects                | Present                 | Common  | .              | 14              | 40                 | Present                | 109,110,111,112,113,114,115,116,117 |
| <i>Parula americana</i>               | Virgin   | Fringillidae | 8.5                | Forest                    | Insects                | Present                 | Common  | Present        | 4               | .                  | Present                | 102,104,105,107,108,118             |
| <i>Parula americana</i>               | .        | Fringillidae | 8.5                | Forest                    | Insects                | Present                 | Common  | .              | .               | .                  | Present                | 111,119                             |
| <i>Parula pitiayumi graysoni</i>      | Socorro  | Fringillidae | 6.3                | Forest                    | Insects                | Present                 | Common  | Present        | .               | 50                 | Absent                 | 120,121,122,123                     |
| <i>Parula pitiayumi</i>               | .        | Fringillidae | 7.2                | Forest                    | Insects                | Present                 | Common  | .              | 2               | .                  | Present                | 102,111,123                         |
| <i>Serinus rufobrunneus thomensis</i> | Sao Tomé | Fringillidae | 22.3               | Mixed                     | Seeds                  | Present                 | Common  | .              | 2               | 15                 | .                      | 34,100,124,125                      |
| <i>Serinus mozambicus caniceps</i>    | .        | Fringillidae | .                  | Mixed                     | Seeds                  | Present                 | Common  | .              | .               | .                  | .                      | 34,100,124                          |
| <i>Hirundo tahitica tahitica</i>      | Society  | Hirundinidae | .                  | Open                      | Insects                | Mixed                   | .       | Absent         | .               | .                  | Absent                 | 2,4,126                             |
| <i>Hirundo tahitica javanicae</i>     | .        | Hirundinidae | 13.1               | Open                      | Insects                | Mixed                   | Common  | .              | .               | 20                 | .                      | 28,126                              |
| <i>Anabathmis newtonii</i>            | Sao Tomé | Nectarinidae | 7                  | Mixed                     | Nectar-insects         | Present                 | Common  | .              | 2               | 30                 | Present                | 31,32,34,35,127,128                 |
| <i>Anabathmis reichenbachii</i>       | .        | Nectarinidae | 11                 | Mixed                     | Insects-nectar         | Absent                  | Common  | .              | 2               | .                  | Mixed                  | 34,127,128                          |
| <i>Gerygone albofrontata</i>          | Chatham  | Pardalotidae | 11.1               | Forest                    | Insects                | Mixed                   | Common  | Present        | .               | 15                 | Present                | 80,81,129,130,131,132,133,134       |

| Species                                    | Island    | Family       | Male body mass (g) | Habitat type <sup>1</sup> | Food type <sup>2</sup> | Intra-specific flocking | Density | Nest predation | Mean flock size | Maximum flock size | Mixed-species flocking | References <sup>3</sup>     |
|--------------------------------------------|-----------|--------------|--------------------|---------------------------|------------------------|-------------------------|---------|----------------|-----------------|--------------------|------------------------|-----------------------------|
| <i>Gerygone mouki</i>                      | .         | Pardalotidae | 5.2                | Forest                    | Insects                | Mixed                   | Common  | .              | 2.5             | 12                 | Present                | 80,133,135                  |
| <i>Foudia flavicans</i>                    | Rodrigues | Passeridae   | 15.9               | Forest                    | Insects-nectar         | Present                 | Low     | Absent         | 2               | 25                 | Present                | 24,136,137,138,139,140,141  |
| <i>Foudia madagascarensis</i>              | .         | Passeridae   | 18.2               | Mixed                     | Seeds-insects          | Present                 | Common  | .              | .               | 100                | Present                | 3,24,65,136                 |
| <i>Erythrura cyanovirens cyanovirens</i>   | Samoa     | Passeridae   | .                  | Forest                    | Seeds-insects          | Absent                  | Low     | .              | 1               | 2                  | Absent                 | 2,60,61,63,100,142,143,144  |
| <i>Erythrura prasina</i>                   | .         | Passeridae   | .                  | Forest                    | Seeds                  | Present                 | Common  | .              | .               | .                  | .                      | 30,100,142,145              |
| <i>Ploceus princeps</i>                    | Principe  | Passeridae   | .                  | Open                      | Insects-seeds          | Present                 | Common  | .              | .               | 30                 | Present                | 31,34,35,67,68,136,146      |
| <i>Ploceus aurantius</i>                   | .         | Passeridae   | .                  | Mixed                     | Insects-fruits         | Present                 | Common  | .              | .               | .                  | .                      | 34,136,146                  |
| <i>Lonchura c. cucullata</i>               | Sao Tomé  | Passeridae   | 9.2                | Open                      | Seeds                  | Present                 | Common  | .              | .               | 80                 | Present                | 3,31,32,34,35,67,68,146,147 |
| <i>Lonchura c. cucullata</i>               | .         | Passeridae   | 9.2                | Open                      | Seeds                  | Present                 | Common  | .              | 14              | .                  | Present                | 34,100,146,147              |
| <i>Vini stepheni</i>                       | Henderson | Psittacidae  | 55                 | Forest                    | Nectar-fruits          | Mixed                   | Common  | Present        | 2               | 5                  | Absent                 | 148,149,150,151,152         |
| <i>Glossopsitta concinna</i>               | .         | Psittacidae  | 79                 | Forest-plantation         | Nectar-fruits          | Present                 | Common  | .              | .               | 100                | Present                | 148,153                     |
| <i>Trichoglossus rubiginosus</i>           | Pohnpei   | Psittacidae  | .                  | Forest                    | Nectar-pollen          | Present                 | Common  | .              | .               | 12                 | Absent                 | 21,148,154                  |
| <i>Trichoglossus haematodus moluccanus</i> | .         | Psittacidae  | 136                | Forest                    | Nectar-pollen          | Present                 | Common  | .              | 2.9             | 1000               | Present                | 148,153,155,156             |

| Species                                 | Island       | Family      | Male body mass (g) | Habitat type <sup>1</sup> | Food type <sup>2</sup> | Intra-specific flocking | Density | Nest predation | Mean flock size | Maximum flock size | Mixed-species flocking | References <sup>3</sup>    |
|-----------------------------------------|--------------|-------------|--------------------|---------------------------|------------------------|-------------------------|---------|----------------|-----------------|--------------------|------------------------|----------------------------|
| <i>Coracopsis nigra barklyi</i>         | Praslin      | Psittacidae | 136                | Forest-plantation         | Fruits                 | Mixed                   | Low     | Present        | 2               | .                  | Absent                 | 23,24,26,27,64,148,157,158 |
| <i>Coracopsis nigra nigra</i>           | .            | Psittacidae | 141                | Forest                    | Fruits                 | Present                 | Common  | .              | .               | 50                 | Absent                 | 3,24,65,66,148             |
| <i>Amazona leucocephala caymanensis</i> | Grand Cayman | Psittacidae | .                  | Mixed                     | Seeds-fruits           | Present                 | Common  | Present        | .               | .                  | Absent                 | 105,148,159,160,161,162    |
| <i>Amazona albifrons</i>                | .            | Psittacidae | .                  | Mixed                     | Seeds-fruits           | Present                 | Common  | .              | .               | 100                | .                      | 111,148,163                |
| <i>Cyanoramphus unicolor</i>            | Antipodes    | Psittacidae | 167.1              | Open                      | Plants                 | Absent                  | Common  | Absent         | 1               | 2                  | Absent                 | 148,153,164,165,166        |
| <i>Platyercus elegans</i>               | .            | Psittacidae | 140                | Forest                    | Plants                 | Mixed                   | Common  | .              | 5.7             | 100                | Present                | 148,153,167,168            |
| <i>Psittacus erithacus princeps</i>     | Principe     | Psittacidae | .                  | Forest                    | Fruits-seeds           | Present                 | Common  | .              | .               | 8                  | .                      | 31,67,68,148,169,170       |
| <i>Psittacus erithacus erithacus</i>    | .            | Psittacidae | 250                | Forest                    | Fruits-seeds           | Present                 | Common  | .              | .               | 30                 | .                      | 3,33,46,69,148             |
| <i>Aplonis opaca guami</i>              | Guam         | Sturnidae   | 83.9               | Forest-plantation         | Fruits-insects         | Present                 | Common  | Present        | 2               | 13                 | Absent                 | 2,3,16,18,19,20,21,58,171  |
| <i>Aplonis panayensis</i>               | .            | Sturnidae   | 56.2               | Forest                    | Fruits-insects         | Present                 | Common  | .              | .               | .                  | .                      | 3,30,172,173               |
| <i>Lamprotornis ornatus</i>             | Principe     | Sturnidae   | .                  | Forest                    | Seeds-insects          | Present                 | Common  | .              | 2               | 30                 | Present                | 31,35,67,68,124,170,171    |
| <i>Lamprotornis splendidus</i>          | .            | Sturnidae   | 133                | Forest                    | Seeds                  | Present                 | Common  | .              | 12              | 300                | Present                | 124,128,171                |

| Species                                   | Island   | Family       | Male body mass (g) | Habitat type <sup>1</sup> | Food type <sup>2</sup> | Intra-specific flocking | Density | Nest predation | Mean flock size | Maximum flock size | Mixed-species flocking | References <sup>3</sup>      |
|-------------------------------------------|----------|--------------|--------------------|---------------------------|------------------------|-------------------------|---------|----------------|-----------------|--------------------|------------------------|------------------------------|
| <i>Onychognathus f. fulgidus</i>          | Sao Tomé | Sturnidae    | .                  | Forest                    | Fruits-insects         | Present                 | Common  | .              | .               | 8                  | .                      | 32,34,68,128,171             |
| <i>Onychognathus fulgidus hartlaubi</i>   | .        | Sturnidae    | 122                | Forest                    | Fruits-insects         | Present                 | Common  | .              | 7.5             | 22                 | Present                | 32,34,68,124,171             |
| <i>Horizorhinus dohrni</i>                | Principe | Sylviidae    | 19                 | Forest                    | Insects-berries        | Present                 | Common  | .              | .               | 10                 | Absent                 | 31,34,35,67,68,128           |
| <i>Kupeornis gilberti</i>                 | .        | Sylviidae    | .                  | Forest                    | Insects                | Present                 | Common  | .              | 6.9             | 13                 | Present                | 34,128                       |
| <i>Prinia molleri</i>                     | Sao Tomé | Sylviidae    | 8.5                | Mixed                     | Insects-fruits         | Present                 | Common  | Present        | 5               | 17                 | Present                | 31,35,68,91,174              |
| <i>Prinia subflava</i>                    | .        | Sylviidae    | 9.3                | Mixed                     | Insects                | Present                 | Common  | .              | .               | .                  | Present                | 34,91                        |
| <i>Zosterops c. conspicillata</i>         | Guam     | Zosteropidae | .                  | Forest                    | Insects                | Present                 | Low     | Present        | 4               | 20                 | Absent                 | 2,16,20,21,174,175           |
| <i>Zosterops senegalensis</i>             | .        | Zosteropidae | 8.1                | Forest                    | Insects-fruits         | Present                 | Common  | .              | 7               | 50                 | Present                | 46,128,174,176               |
| <i>Zosterops c. rotensis</i>              | Rota     | Zosteropidae | .                  | Forest                    | Fruits-insects         | Present                 | Low     | Present        | .               | 23                 | Absent                 | 2,16,17,20,21,22,174,177,178 |
| <i>Zosterops montanus</i>                 | .        | Zosteropidae | 10.5               | Forest                    | Insects                | Present                 | Common  | .              | .               | .                  | Present                | 3,172,174                    |
| <i>Zosterops lateralis chlorocephalus</i> | Heron    | Zosteropidae | 14.1               | Mixed                     | Fruits-insects         | Present                 | Common  | Rate           | 2               | 30                 | Absent                 | 179,180,181,182,183          |
| <i>Zosterops lateralis familiaris</i>     | .        | Zosteropidae | 12.9               | Mixed                     | Nectar-invertebrates   | Present                 | Common  | .              | .               | .                  | .                      | 3,80,88,179                  |
| <i>Zosterops hypolais</i>                 | Yap      | Zosteropidae | .                  | Forest                    | .                      | Present                 | .       | .              | .               | .                  | Absent                 | 2,21,174                     |
| <i>Zosterops erythropleurus</i>           | .        | Zosteropidae | 10.9               | Forest                    | .                      | Present                 | Common  | .              | .               | .                  | Present                | 3,30,184,185                 |

| Species                                  | Island   | Family       | Male body mass (g) | Habitat type <sup>1</sup> | Food type <sup>2</sup> | Intra-specific flocking | Density | Nest predation | Mean flock size | Maximum flock size | Mixed-species flocking | References <sup>3</sup> |
|------------------------------------------|----------|--------------|--------------------|---------------------------|------------------------|-------------------------|---------|----------------|-----------------|--------------------|------------------------|-------------------------|
| <i>Zosterops ficedulinus ficedulinus</i> | Principe | Zosteropidae | .                  | Forest                    | Insects                | Present                 | Common  | .              | .               | 20                 | Present                | 31,35,68,124,128        |
| <i>Zosterops pallidus</i>                | .        | Zosteropidae | 10.3               | Forest                    | Insects-fruits         | Present                 | Common  | .              | .               | 100                | .                      | 34,128                  |

<sup>1</sup> Mixed habitat type corresponds to cases where species inhabit a mixture of habitats typically including open and forested areas

<sup>2</sup> Mixed food type corresponds to cases where species fed on a variety of food types including animal and vegetable matter

<sup>3</sup> References: (1) (Johnsgard 1978); (2) (Pratt *et al.* 1987); (3) (Dunning 1993); (4) (Holyoak 1974); (5) (Petitot & Petitot 1975); (6) (Thibault 1975); (7) (Cramp & Simmons 1977); (8) (Palmer 1976); (9) (Drilling *et al.* 2002); (10) (Moulton & Marshall 1996); (11) (Olson & Ziegler 1995); (12) (Johnson & Sorenson 1999); (13) (Marchant & Higgins 1990); (14) (Lee *et al.* 1996); (15) (Chantler & Driessens 2000); (16) (Jenkins 1983); (17) (Stott 1947); (18) (Marshall 1949); (19) (Pratt *et al.* 1979); (20) (Reichel *et al.* 1994); (21) (Engbring & Pratt 1985); (22) (Steadman 1999); (23) (Skerrett & Bullock 2001); (24) (Sinclair & Langrand 1998); (25) (Johnson & Clayton 1999); (26) (Gaymer *et al.* 1969); (27) (Penny 1974); (28) (Waugh & Hails 1983); (29) (Lourie & Tompkins 2000); (30) (Robson 2000); (31) (Snow 1950); (32) (Bannerman 1915); (33) (Fry *et al.* 1988); (34) (Borrow & Demey 2001); (35) (Atkinson *et al.* 1991); (36) (Grimmett *et al.* 1999); (37) (McCulloch 1991); (38) (Ashmole 1963); (39) (Johnsgard 1981); (40) (Hayman *et al.* 1986); (41) (Lockwood *et al.* 1996); (42) (McCulloch & Norris 2001); (43) (Rowlands *et al.* 1998); (44) (Urban *et al.* 1986); (45) (Owino 2002); (46) (Zimmerman *et al.* 1996); (47) (Gibbs *et al.* 2001); (48) (Shapiro *et al.* 2002); (49) (Livezey 1993); (50) (Janoo 2000); (51) (Beehler *et al.* 1986); (52) (Goodwin 1983); (53) (Rand & Gilliard 1967); (54) (King & Nijboer 1994); (55) (Thibault & Guyot 1987); (56) (Steadman 1997); (57) (Wells 1999); (58) (Craig 1996); (59) (Higgins & Davies 1996); (60) (Watling 1982); (61) (Muse & Muse 1982); (62) (Armstrong 1932); (63) (DuPont 1972); (64) (Feare *et al.* 1974); (65) (Langrand 1990); (66) (Morris & Hawkins 1998); (67) (Bannerman 1914); (68) (Christy & Clarke 1998); (69) (Bannerman 1931); (70) (Bannerman 1931); (71) (Madge & Brun 1994); (72) (Wiles 1998); (73) (Tomback 1986); (74) (Michael 1987); (75) (Fancy *et al.* 1999); (76) (Tarr & Fleischer 1999); (77) (Goodwin 1986); (78) (Delacour & Jabouille 1931); (79) (McLean *et al.* 1987); (80) (Higgins & Peter 2002); (81) (Heather & Robertson 1997); (82) (Fox 1978); (83) (Gill & McLean 1992); (84) (Smuts-Kennedy & Lovegrove 1996); (85) (Girardet *et al.* 2001); (86) (Gravatt 1971); (87) (Boles 1988); (88) (Pizzey 1997); (89) (McLean & Jenkins 1980); (90) (McLean 1984); (91) (Urban *et al.* 1997); (92) (de Naurois 1984); (93) (Morin & Conant 2002); (94) (Johnson *et al.* 1989); (95) (Chu 2002); (96) (Adkinsson 1996); (97) (Benkman 1987); (98) (Newton 1972); (99) (Cramp & Perrins 1994); (100) (Clement 1992); (101) (Clouet 2000); (102) (Curson *et al.* 1994); (103) (Kricher 1995); (104) (Ewert & Askins 1991); (105) (Raffaele *et al.* 1998); (106) (Keast 1980); (107) (Robertson 1962); (108) (Askins *et al.* 1992); (109) (Buskirk *et al.* 1972); (110) (Rappole & Warner 1980); (111) (Howell & Webb 1995); (112) (Powell *et al.* 1992); (113) (Powell 1979); (114) (Gram 1998); (115) (Hutto 1994); (116) (King & Rappole 2000); (117) (Jones *et al.* 2000); (118) (Moldenhauer & Regelski 1996); (119) (Post 1978); (120) (Brattstrom & Howell 1956); (121) (Jehl & Parkes 1982); (122) (Parkes 1990); (123) (Regelski & Moldenhauer 1997); (124) (Bannerman 1948); (125) (de Naurois 1975); (126) (Turner 1989); (127) (Cheke & Mann 2001); (128) (Fry *et al.*



2000); (129) (Olson 1984); (130) (Dennison *et al.* 1978); (131) (West 1988); (132) (Fleming 1939); (133) (Ford 1986); (134) (O'Donnell & Dilks 1993); (135) (Serventy 1982); (136) (Crook 1964); (137) (Gill 1967); (138) (Cheke 1987); (139) (Impey *et al.* 2002); (140) (Cheke 1987); (141) (Cowles 1987); (142) (Goodwin 1982); (143) (Bellingham & Davis 1988); (144) (Dhondt 1976); (145) (Smythies 1999); (146) (Bannerman 1949); (147) (Restall 1997); (148) (Juniper & Parr 1998); (149) (Graves 1992); (150) (Trevelyan 1995); (151) (Williams 1960); (152) (Wragg 1995); (153) (Higgins & Davies 1999); (154) (Buden 2000); (155) (Utschick & Brandl 1989); (156) (Franklin 1997); (157) (Merritt *et al.* 1986); (158) (Forshaw 1989); (159) (Bradley 1985); (160) (Bradley 1994); (161) (Bradley 2000); (162) (Nichols 1980); (163) (Levinson 1980); (164) (Taylor 1985); (165) (Greene 1999); (166) (Warham & Bell 1979); (167) (Holyoak 1973); (168) (Boon *et al.* 2001); (169) (Juste 1996); (170) (Moreau 1966); (171) (Feare & Craig 1998); (172) (Coates & Bishop 1997); (173) (Bannerman 1939); (174) (Slikas *et al.* 2000); (175) (Craig 2002); (176) (Kalinganire *et al.* 2001); (177) (Craig & Taisacan 1994); (178) (Craig 1999); (179) (Kikkawa 1970); (180) (Degnan 1993); (181) (Catterall *et al.* 1992); (182) (Kikkawa 1980); (183) (Catterall *et al.* 1989); (184) (Etchécopar & Hue 1983); (185) (MacKinnon & Phillipps 2000);

## REFERENCES

- Adkinsson, C. S. (1996) Common crossbill. In *The birds of North America* (A. Poole & F. B. Gill), Philadelphia and Washington, D.C.: The Academy of Natural Sciences and The American Ornithologists' Union.
- Armstrong, J. S. (1932) *Hand-list of the birds of Samoa*. London: Bale & Danielson.
- Ashmole, N. P. (1963) The extinct avifauna of St-Helena island. *Ibis* **103b**, 390-408.
- Askins, R. A., Ewert, D. N. & Norton, R. L. (1992) Abundance of wintering migrants in fragmented and continuous forests in the U.S. Virgin islands. In *Ecology and conservation of neotropical migrant landbirds* (J. M. Hagan & D. W. Johnston), Washington: Smithsonian Institution Press.
- Atkinson, P., Peet, N. & Alexander, J. (1991) The status and conservation of the endemic bird species of Sao Tome and Principe, West Africa. *Bird Conserv. Int* **1**, 255-282.
- Bannerman, D. A. (1914) The birds of Prince's island. *Ibis* **10**, 596-631.
- Bannerman, D. A. (1915) The birds of St-Thomas island. *Ibis* **10**, 89-121.
- Bannerman, D. A. (1931) *The birds of tropical West Africa, vol. 2*. Edinburgh: Oliver & Boyd.
- Bannerman, D. A. (1931) The maroon pigeon of Sao Tomé. *Ibis* **13**, 652-654.
- Bannerman, D. A. (1939) *The birds of tropical West Africa, vol. 5*. Edinburgh: Oliver & Boyd.
- Bannerman, D. A. (1948) *The birds of tropical West Africa, vol. 6*. Edinburgh: Oliver & Boyd.
- Bannerman, D. A. (1949) *The birds of tropical West Africa, vol. 7*. Edinburgh: Oliver & Boyd.
- Beehler, B. M., Pratt, T. K. & Zimmerman, D. A. (1986) *Birds of New Guinea*. Princeton: Princeton University Press.
- Bellingham, M. & Davis, A. (1988) Forest bird communities in Western Samoa. *Notornis* **35**, 117-128.
- Benkman, C. W. (1987) Food profitability and the foraging ecology of crossbills. *Ecol. Monogr.* **57**, 251-267.
- Boles, W. E. (1988) *The robins and flycatchers of Australia*. North Ryde: Angus & Robertson.
- Boon, W. M., Daugherty, C. H. & Chambers, G. K. (2001) The Norfolk Island green parrot and New Caledonian red-crowned parakeet are distinct species. *Emu* **101**, 113-121.
- Borrow, N. & Demey, R. (2001) *A guide to the birds of western Africa*. Princeton: Princeton University Press.
- Bradley, P. E. (1985) *Birds of the Cayman islands*. Georgetown: P. E. Bradley.
- Bradley, P. E. (1994) The avifauna of the Cayman islands: an overview. In *The Cayman islands: Natural history and biogeography* (M. A. Bryant & J. E. Davies), pp. 377-406. Dordrecht: Kluwer.
- Bradley, P. E. (2000) *The birds of the Cayman islands*. Tring: British Ornithologist's Union.
- Brattstrom, B. H. & Howell, T. R. (1956) The birds of Revilla Gigedo Islands, Mexico. *Condor* **58**, 107-120.

- Buden, D. W. (2000) A comparison of 1983 and 1994 bird surveys of Pohnpei, federated states of Micronesia. *Wilson Bull.* **112**, 403-410.
- Buskirk, W. H., Powell, G. V., Wittenberger, J. F., Buskirk, W. H. & Powell, T. V. (1972) Interspecific bird flocks in tropical highland Panama. *Auk* **89**, 612-624.
- Catterall, C. P., Elgar, M. A. & Kikkawa, J. (1992) Vigilance does not covary with group size in an island population of silvereyes (*Zosterops lateralis*). *Behav. Ecol.* **3**, 207-210.
- Catterall, C. P., Kikkawa, J. & Gray, C. (1989) Inter-related age-dependent patterns of ecology and behaviour in a population of silvereyes (Aves: Zosteropidae). *J. Anim. Ecol.* **58**, 557-570.
- Chantler, P. & Driessens, G. (2000) *Swifts: A guide to the swifts and treeswifts of the world*. Sussex: Pica Press.
- Cheke, A. S. (1987) An ecological history of the Mascarene islands, with particular reference to extinctions and introductions of land vertebrates. In *Studies of Mascarene island birds* (A. W. Diamond), pp. 5-89. Cambridge: Cambridge University Press.
- Cheke, A. S. (1987) Observations on the surviving endemic birds of the Rodrigues. In *Studies of Mascarene island birds* (A. W. Diamond), pp. 364-402. Cambridge: Cambridge University Press.
- Cheke, R. A. & Mann, C. F. (2001) *Sunbirds: A guide to the sunbirds, flowerpeckers, spiderhunters and sugarbirds of the world*. New Haven: Yale University Press.
- Christy, P. & Clarke, W. V. (1998) *Guide des oiseaux de Sao Tomé et Principe*. Gabon: ECOFAC.
- Chu, P. C. (2002) A morphological test of the monophyly of the cardueline finches (Aves : Fringillidae, Carduelinae). *Cladistics* **18**, 279-312.
- Clement, P. (1992) *Finches and sparrows*. Princeton: Princeton University Press.
- Clouet, M. (2000) The breeding biology of the Common Crossbill *Loxia curvirostra* in the Central Pyrenees. *Bird Study* **47**, 186-194.
- Coates, B. J. & Bishop, K. D. (1997) *A guide to the birds of Wallacea*. Alderley: Dove Publications.
- Cowles, G. S. (1987) The fossil record. In *Studies of Mascarene island birds* (A. W. Diamond), pp. 90-100. Cambridge: Cambridge University Press.
- Craig, R. J. (1996) Seasonal population surveys and natural history of a Micronesian bird community. *Wilson Bull.* **108**, 246-267.
- Craig, R. J. (1999). Conservation of endangered white-eyes (Zosteropidae) in the tropical Pacific. Proceedings of the 22nd International Ornithological Conference, Durban.
- Craig, R. J. (2002) Aspects of flocking behavior in an endemic Pacific island white-eye. *J. Field Ornithol.* **73**, 70-73.
- Craig, R. J. & Taisacan, E. (1994) Notes on the ecology and population decline of the Rota bridled white-eye. *Wilson Bull.* **106**, 165-169.
- Cramp, S. & Perrins, C. M. (1994) *Handbook of the birds of Europe, the Middle East and North Africa, vol. 8*. Oxford: Oxford University Press.
- Cramp, S. & Simmons, K. E. L. (1977) *Handbook of the birds of Europe, the Middle East and North Africa, vol. 1*. Oxford: Oxford University Press.

- Crook, J. H. (1964) The evolution of social organisation and visual communication in the weaver birds (Ploceinae). *Behaviour Suppl.* **10**, 1-178.
- Curson, J., Quinn, D. & Beadle, D. (1994) *Warblers of the Americas*. Boston: Houghton Mifflin.
- de Naurois, R. (1975) Les Carduelinae des îles de Sao Tomé et Príncipe (Golfe de Guinée). *Ardeola* **21**, 903-931.
- de Naurois, R. (1984) Le moucherolle endémique de l'île de Sao Tomé, *Terpsiphone atrochalybeia* (Thompson 1842). *Alauda* **52**, 31-44.
- Degnan, S. M. (1993) Genetic variability and population differentiation inferred from DNA fingerprinting in silvereyes (Aves: Zosteropidae). *Evolution* **47**, 1105-1117.
- Delacour, J. & Jabouille, P. (1931) *Les oiseaux de l'Indochine française*. Paris: Exposition Coloniale Internationale.
- Dennison, M. D., Dennison, T. C. & Robertson, H. A. (1978) Notes on the Chatham island fantail. *Notornis* **25**, 254-255.
- Dhondt, A. (1976) Bird observations in Western Samoa. *Notornis* **23**, 29-43.
- Drilling, N., Titman, R. & McKinney, F. (2002) Mallard. In *The birds of North America* (A. Poole & F. B. Gill), Philadelphia and Washington, D.C.: The Academy of Natural Sciences and The American Ornithologists' Union.
- Dunning, J. B. (1993) *CRC handbook of avian body masses*. Boca Raton: CRC Press.
- DuPont, J. E. (1972) Notes from Western Samoa, including the description of a new parrot-finch (*Erythrura*). *Wilson Bull.* **84**, 375-376.
- Engbring, J. & Pratt, H. D. (1985) Endangered birds in Micronesia: their history, status and future prospects. In *Bird conservation II* (S. A. Temple), pp. 71-106. Madison: University of Wisconsin Press.
- Etchécopar, R. D. & Hue, F. (1983) *Les oiseaux de Chine*. Paris: Société Nouvelle Edition.
- Ewert, D. N. & Askins, R. A. (1991) Flocking behaviour of migratory warblers in winter in the Virgin Islands. *Condor* **93**, 864-868.
- Fancy, S. G., Lusk, M. R. & Grout, D. J. (1999) Status of the Mariana Crow population on Rota, Mariana Islands. *Micronesica* **32**, 3-10.
- Feare, C. & Craig, A. (1998) *Starlings and mynas*. London: Christopher Helm.
- Feare, C. J., Temple, S. A. & Procter, J. (1974) The status, distribution and diet of the Seychelles kestrel, *Falco araea*. *Ibis* **116**, 548-551.
- Fleming, C. A. (1939) Birds of the Chatham islands. *Emu* **38**, 492-509.
- Ford, J. (1986) Phylogeny of the Acanthizid warbler genus *Gerygone* based on numerical analyses of morphological characters. *Emu* **86**, 12-22.
- Forshaw, J. M. (1989) *Parrots of the world*. London: Blandford.
- Fox, N. C. (1978) The distribution and numbers of New Zealand falcons (*Falco novaeseelandiae*). *Notornis* **25**, 317-331.
- Franklin, D. C. (1997) The foraging behaviour of avian nectarivores in a monsoonal Australian woodland over a six-month period. *Corella* **21**, 48-54.
- Fry, C. H., Keith, S. & Urban, E. K. (1988) *Birds of Africa, vol. 3*. London: Academic Press.
- Fry, C. H., Keith, S. & Urban, E. K. (2000) *Birds of Africa, vol. 6*. London: Academic Press.

- Gaymer, R., Blackman, R. A. A., Dawson, P. G., Penny, M. & Penny, C. M. (1969) Endemic birds of the Seychelles. *Ibis* **111**, 157-176.
- Gibbs, D., Barnes, E. & Cox, J. (2001) *Pigeons and doves*. New Haven: Yale University Press.
- Gill, B. J. & McLean, I. G. (1992) Population dynamics of the New Zealand whitehead (*Pachycephalidae*), a communal breeder. *Condor* **94**, 628-635.
- Gill, F. B. (1967) Birds of Rodrigues Island. *Ibis* **109**, 383-390.
- Girardet, S. A. B., Veitch, C. R. & Craig, J. L. (2001) Bird and rat numbers on Little Barrier Island, New Zealand, over the period of cat eradication 1976-80. *New Zealand J. Zool.* **28**, 13-29.
- Goodwin, D. (1982) *Estrildid finches of the world*. Oxford: Oxford University Press.
- Goodwin, D. (1983) *Pigeons and doves of the world*. Ithaca: Cornell University Press.
- Goodwin, D. (1986) *Crows of the world*. London: British Museum.
- Gram, W. K. (1998) Winter participation by neotropical migrant and resident birds in mixed-species flocks in northeastern Mexico. *Condor* **100**, 44-53.
- Gravatt, D. J. (1971) Aspects of habitat use by New Zealand honeyeaters, with reference to other forest species. *Emu* **71**, 65-72.
- Graves, G. R. (1992) The endemic landbirds of Henderson island, south eastern Polynesia: Notes on natural history and conservation. *Wilson Bull.* **104**, 32-43.
- Greene, T. C. (1999) Aspects of the ecology of Antipodes island parakeet (*Cyanoramphus unicolor*) and Reischek's parakeet (*C. novaezelandiae hochstetteri*) on Antipodes island, October-November 1995. *Notornis* **46**, 301-310.
- Grimmett, R., Inskipp, C. & Inskipp, T. (1999) *A guide to the birds of India, Pakistan, Nepal, Bangladesh, Bhutan, Sri Lanka and the Maldives*. Princeton: Princeton University Press.
- Hayman, P., Marchant, J. & Prater, T. (1986) *Shorebirds: an identification guide to the waders of the world*. London: Croom Helm.
- Heather, B. D. & Robertson, H. A. (1997) *The field guide to the birds of New Zealand*. Oxford: Oxford University Press.
- Higgins, P. J. & Davies, S. J. J. F. (1996) *Handbook of Australian, New Zealand and Antarctic birds, vol. 3*. Melbourne: Oxford University Press.
- Higgins, P. J. & Davies, S. J. J. F. (1999) *Handbook of Australian, New Zealand and Antarctic birds, vol. 4*. Melbourne: Oxford University Press.
- Higgins, P. J. & Peter, J. M. (2002) *Handbook of Australian, New Zealand and Antarctic birds, vol. 6*. Melbourne: Oxford University Press.
- Holyoak, D. T. (1973) Comments on taxonomy and relationships in the parrot sub-families Nestorinae, Loriinae and Platycercinae. *Emu* **73**, 157-176.
- Holyoak, D. T. (1974) Les oiseaux des îles de la Société. *L'oiseau et R. F. O.* **44**, 153-184.
- Howell, S. N. G. & Webb, S. W. (1995) *The birds of Mexico and northern Central America*. Oxford: Oxford University Press.
- Hutto, R. L. (1994) The composition and social organization of mixed-species flocks in a tropical deciduous forest in western Mexico. *Condor* **96**, 105-118.

- Impey, A. J., Cote, I. M. & Jones, C. G. (2002) Population recovery of the threatened endemic Rodrigues fody (*Foudia flavicans*) (Aves, Ploceidae) following reforestation. *Biol. Cons.* **107**, 299-305.
- Janoo, A. (2000) Rooting the dodo *Raphus cucullatus* Linnaeus 1758 and the Solitaire *Pezophaps solitaria* Gmelin 1789 within the Ornithurae: a cladistic reappraisal. *Ostrich* **71**, 323-329.
- Jehl, J. R. & Parkes, K. C. (1982) The status of the avifauna of the Revillagigedo Islands, Mexico. *Wilson Bull.* **94**, 1-19.
- Jenkins, J. M. (1983) *The native forest birds of Guam*. Washington: American Ornithologists' Union.
- Johnsgard, P. A. (1978) *Ducks, geese and swans of the world*. Lincoln: University of Nebraska Press.
- Johnsgard, P. A. (1981) *The plovers, sandpipers, and snipes of the world*. Lincoln: University of Nebraska Press.
- Johnson, K. P. & Clayton, D. H. (1999) Swiftlets on islands: genetics and phylogeny of the Seychelles and Mascarene swiftlets. *Phelsuma* **7**, 9-13.
- Johnson, K. P. & Sorenson, M. D. (1999) Phylogeny and biogeography of dabbling ducks (genus : *Anas*): a comparison of molecular and morphological evidence. *Auk* **116**, 792-805.
- Johnson, N. K., Marten, J. A. & Ralph, C. J. (1989) Genetic evidence for the origin and relationships of Hawaiian honeycreepers (Aves: Fringillidae). *Condor* **91**, 379-396.
- Jones, J., Perazzi, P. R., Carruthers, E. H. & Robertson, R. J. (2000) Sociality and foraging behavior of the Cerulean Warbler in Venezuelan shade-coffee plantations. *Condor* **102**, 958-962.
- Juniper, T. & Parr, M. (1998) *Parrots: A guide to parrots of the world*. New Haven: Yale University Press.
- Juste, B. J. (1996) Trade in the gray parrot *Psittacus erithacus* on the island of Principe (Sao Tome and Principe, Central Africa): Initial assessment of the activity and its impact. *Biol. Cons.* **76**, 101-104.
- Kalinganire, A., Harwood, C. E., Slee, M. U. & Simons, A. J. (2001) Pollination and fruit-set of *Grevillea robusta* in western Kenya. *Austral Ecol.* **26**, 637-648.
- Keast, A. (1980) Spatial relationship between migratory parulid warblers and their ecological counterparts in the Neotropics. In *Migrant birds in the neotropics: ecology, behavior, distribution and conservation* (A. Keast & E. S. Morton), pp. 109-132. Washington: Smithsonian Institution Press.
- Kikkawa, J. (1970) Birds recorded at Heron Island. *Sunbird* **1**, 34-48.
- Kikkawa, J. (1980) Winter survival in relation to dominance classes among silvereyes *Zosterops lateralis chlorocephala* of Heron Island, Great Barrier Reef. *Ibis* **122**, 437-446.
- King, C. E. & Nijboer, J. (1994) Conservation considerations for crowned pigeons, genus *Goura*. *Oryx* **28**, 22-30.
- King, D. I. & Rappole, J. H. (2000) Winter flocking of insectivorous birds in montane pine-oak forests in middle America. *Condor* **102**, 664-672.

- Kricher, J. C. (1995) Black-and-white warbler. In *The birds of North America* (A. Poole & F. B. Gill), Philadelphia and Washington, D.C.: The Academy of Natural Sciences and The American Ornithologists' Union.
- Langrand, O. (1990) *Birds of Madagascar*. New Haven: Yale University Press.
- Lee, P. L. M., Clayton, D. H., Griffiths, R. & Page, R. D. M. (1996) Does behavior reflect phylogeny in swiftlets (Aves, Apodidae) - a test using cytochrome b mitochondrial DNA sequences. *Proc. Natl. Acad. Sci.* **93**, 7091-7096.
- Levinson, S. T. (1980) The social behaviour of the white-fronted amazon (*Amazona albifrons*). In *Conservation of New World parrots* (R. F. Pasquier), Washington: Smithsonian Institution Press.
- Livezey, B. C. (1993) An ecomorphological review of the dodo (*Raphus cucullatus*) and solitaire (*Pezophaps solitaria*), flightless Columbiformes of the Mascarene islands. *J. Zool.* **230**, 247-292.
- Lockwood, J. L., Moulton, M. P. & Brooke, R. K. (1996) Morphological dispersion of the introduced land-birds of Saint Helena. *Ostrich* **67**, 111-117.
- Lourie, S. A. & Tompkins, D. M. (2000) The diets of Malaysian swiftlets. *Ibis* **142**, 596-602.
- MacKinnon, J. & Phillipps, K. (2000) *A field guide to the birds of China*. Oxford: Oxford University Press.
- Madge, S. & Brun, H. (1994) *Crows and jays: A guide to the crows, jays and magpies of the world*. Boston: Houghton Mifflin.
- Marchant, S. & Higgins, P. J. (1990) *Handbook of Australian, New Zealand and Antarctic birds, vol. 1*. Melbourne: Oxford University Press.
- Marshall, J. T. (1949) The endemic avifauna of Saipan, Tinian, Guam and Palau. *Condor* **51**, 200-221.
- McCulloch, N. M. & Norris, K. (2001) Diagnosing the cause of population changes: Localized habitat change and the decline of the endangered St Helena wirebird. *J. Appl. Ecol.* **38**, 771-783.
- McCulloch, N. M. (1991) Status, habitat and conservation of the St-Helena wirebird *Charadrius santaehelenae*. *Bird Conserv. Int* **1**, 361-392.
- McLean, I. G. (1984) Feeding association between fantails and saddlebacks: Who benefits? *New Zealand J. Ecol.* **7**, 165-168.
- McLean, I. G. & Jenkins, P. F. (1980) Breeding and development of the New Zealand fantail *Rhipidura fuliginosa*. *Notornis* **27**, 105-113.
- McLean, I. G., Wells, M. S., Brown, R., Cresswell, P., McKenzie, J. & Musgrove, R. (1987) Mixed species flocking of forest birds on Little Barrier Island. *New Zealand J. Zool.* **14**, 143-147.
- Merritt, R. E., Bell, P. A. & Laboudallon, V. (1986) Breeding biology of the Seychelles black parrot (*Coracopsis nigra barklyi*). *Wilson Bull.* **98**, 160-163.
- Michael, G. A. (1987) Notes on the breeding biology and ecology of the Mariana or Guam crow. *Avic. Mag.* **93**, 73-82.
- Moldenhauer, R. R. & Regelski, D. J. (1996) Northern parula. In *The birds of North America* (A. Poole & F. B. Gill), Philadelphia and Washington, D.C.: The Academy of Natural Sciences and The American Ornithologists' Union.
- Moreau, R. E. (1966) *The bird faunas of Africa and its islands*. New York: Academic Press.

- Morin, M. P. & Conant, S. (2002) Laysan Finch: *Telespiza cantans*, Nihoa Finch: *Telespiza ultima*. In *The birds of North America* (A. Poole & F. B. Gill), Philadelphia and Washington, D.C.: The Academy of Natural Sciences and The American Ornithologists' Union.
- Morris, P. & Hawkins, F. (1998) *Birds of Madagascar: A photographic guide*. Princeton: Princeton University Press.
- Moulton, D. W. & Marshall, A. P. (1996) Laysan duck. In *The birds of North America* (A. Poole & F. B. Gill), Philadelphia and Washington, D.C.: The Academy of Natural Sciences and The American Ornithologists' Union.
- Muse, C. & Muse, S. (1982) *Birds and birdlore of Samoa*. Walla Walla: Pioneer Press.
- Newton, I. (1972) *Finches*. London: William Collins and Sons.
- Nichols, T. D. (1980) St-Vincent amazon (*Amazona guildingii*): Predators, clutch size, plumage polymorphism, effect of the volcanic eruption and population estimates. In *Conservation of New World parrots* (R. F. Pasquier), pp. 133-160. Washington: Smithsonian Institution Press.
- O'Donnell, C. F. J. & Dilks, P. (1993) Habitat use in autumn by forest birds on South East island, Chatham islands. *Notornis* **40**, 247-252.
- Olson, S. L. (1984) The relationships of the extinct Chatham island eagle. *Notornis* **31**, 273-277.
- Olson, S. L. & Ziegler, A. C. (1995) Remains of land birds from Lisianski Island, with observations on the terrestrial avifauna of the Northwestern Hawaiian Islands. *Pacific Sci.* **49**, 111-125.
- Owino, A. (2002) Shoreline distribution patterns of Kittlitz's plover' *Charadrius pecuarius* Temminck, at Lake Nakuru, Kenya. *Afr. J. Ecol.* **40**, 396-398.
- Palmer, R. S. (1976) *Handbook of North American birds, vol. 5*. New Haven: Yale University Press.
- Parkes, K. C. (1990) Was the Socorro mockingbird (*Mimodes graysoni*) a predator of small birds? *Wilson Bull.* **102**, 317-320.
- Penny, M. (1974) *The birds of Seychelles and outlying islands*. London: Collins.
- Petitot, C. & Petitot, F. (1975) Observations ornithologiques dans l'atoll de Mahini (Tuomatu) et dans l'île de Tubuai (Australes). *L'oiseau et R. F. O.* **45**, 83-88.
- Pizzey, G. (1997) *The field guide to the birds of Australia*. Sydney: Angus & Robertson.
- Post, W. (1978) Social and foraging behavior of warblers wintering in Puerto Rico coastal scrub. *Wilson Bull.* **90**, 197-214.
- Powell, G. V. N. (1979) Structure and dynamics of interspecific flocks in a neotropical mid-elevation forest. *Auk* **96**, 375-390.
- Powell, G. V. N., Rappole, J. H. & Sader, S. A. (1992) Neotropical migrant landbird use of lowland Atlantic habitats in Costa Rica: A test of remote sensing for identification of habitat. In *Ecology and conservation of neotropical migrant landbirds* (J. M. Hagan & D. W. Johnston), pp. 287-298. Washington: Smithsonian Institution Press.
- Pratt, D. H., Bruner, P. & Berrett, D. G. (1987) *A field guide to the birds of Hawaii and the tropical Pacific*. Princeton: Princeton University Press.
- Pratt, H. D., Bruner, P. & Berrett, D. G. (1979) America's unknown avifauna: the birds of the Mariana Islands. *Amer. Birds* **33**, 227-235.



- Raffaele, H., Wiley, J., Garrido, O., Keith, A. & Raffaele, J. (1998) *A guide to the birds of the West Indies*. Princeton: Princeton University Press.
- Rand, A. L. & Gilliard, E. T. (1967) *The handbook of New Guinea birds*. London: Weidenfeld & Nicolson.
- Rappole, J. H. & Warner, D. W. (1980) Ecological aspects of migrant bird behavior in Veracruz, Mexico. In *Migrant birds in the neotropics: ecology, behavior, distribution and conservation* (A. Keast & E. S. Morton), pp. 353-393. Washington: Smithsonian Institution Press.
- Regelski, D. J. & Moldenhauer, R. R. (1997) Tropical parula. In *The birds of North America* (A. Poole & F. B. Gill), Philadelphia and Washington, D.C.: The Academy of Natural Sciences and The American Ornithologists' Union.
- Reichel, J. D., Glass, P. O. & Stinson, D. W. (1994) Status of the common buzzard *Buteo buteo* in the northern Mariana islands, Pacific ocean. *Emu* **94**, 53-55.
- Restall, R. (1997) *Munias and mannikins*. New Haven: Yale University Press.
- Robertson, W. B. (1962) Observations on the birds of St-John, Virgin Islands. *Auk* **79**, 44-76.
- Robson, C. (2000) *A guide to the birds of southeast Asia*. Princeton: Princeton University Press.
- Rowlands, B. W., Trueman, T., Olson, S. L., McCulloch, M. N. & Brooke, R. K. (1998) *The birds of St-Helena*. Tring: British Ornithologists' Union.
- Serventy, V. N. (1982) *The wrens and warblers of Australia*. Sydney: Angus & Robertson.
- Shapiro, B., Sibthorpe, D., Rambaut, A., Austin, J., Wragg, G. M., Bininta-Emonds, O. R. P., Lee, P. L. M. & Cooper, A. (2002) Flight of the dodo. *Science* **295**, 1683.
- Sinclair, I. & Langrand, O. (1998) *Birds of the Indian Ocean islands*. Cape Town: Struik Publishers.
- Skerrett, A. & Bullock, J. (2001) *Birds of the Seychelles*. Princeton: Princeton University Press.
- Slikas, B., Jones, I. B., Derrickson, S. R. & Fleischer, R. C. (2000) Phylogenetic relationships of Micronesian white-eyes based on mitochondrial sequence data. *Auk* **117**, 355-365.
- Smuts-Kennedy, C. & Lovegrove, T. (1996) A barn owl (*Tyto alba*) on Little Barrier Island. *Notornis* **43**, 49-50.
- Smythies, B. E. (1999) *The birds of Borneo*. Kuala Lumpur: The Sabah Society and The Malayan Nature Society.
- Snow, D. W. (1950) The birds of Sao Tomé and Príncipe in the Gulf of Guinea. *Ibis* **92**, 579-595.
- Steadman, D. W. (1997) The historic biogeography and community ecology of Polynesian pigeons and doves. *J. Biogeogr.* **24**, 737-753.
- Steadman, D. W. (1999) The prehistory of vertebrates, especially birds, on Tinian, Aguiuan, and Rota, Northern Mariana Islands. *Micronesica* **31**, 319-345.
- Stott, K. (1947) Notes on Saipan birds. *Auk* **64**, 523-527.
- Tarr, C. L. & Fleischer, R. C. (1999) Population boundaries and genetic diversity in the endangered Mariana crow (*Corvus kubaryi*). *Mol. Ecol.* **8**, 941-949.

- Taylor, R. H. (1985) Status, habitats and conservation of *Cyanoramphus* parakeets in the New Zealand region. In *Conservation of island birds* (P. J. Moors), pp. 195-211. Cambridge: ICBP Technical Publication.
- Thibault, J. C. (1975) *Birds of Tahiti*. Papeete: Les éditions du Pacifique.
- Thibault, J. C. & Guyot, I. (1987) Recent changes in the avifauna of Makatea island (Tuomatus, Central Pacific). *Atoll Res. Bull.* **300**, 1-13.
- Tomback, D. F. (1986) Observations on the behavior and ecology of the Mariana crow. *Condor* **88**, 398-401.
- Trevelyan, R. (1995) The feeding ecology of Stephen's lory and nectar availability in its food plants. *Biol. J. Linnean Soc.* **56**, 185-197.
- Turner, A. (1989) *A handbook to the swallows and martins of the world*. London: Christopher Helm.
- Urban, E. K., Fry, C. H. & Keith, S. (1986) *The birds of Africa, vol. 2*. London: Academic Press.
- Urban, E. K., Fry, C. H. & Keith, S. (1997) *The birds of Africa, vol. 5*. London: Academic Press.
- Utschick, H. & Brandl, R. (1989) Roosting activity of the rainbow lory (*Trichoglossus haematodus*) at Wau, Papua New Guinea. *Spixiana* **11**, 303-310.
- Warham, J. & Bell, B. D. (1979) The birds of Antipodes island, New Zealand. *Notornis* **26**, 121-169.
- Watling, D. (1982) *Birds of Fiji, Tonga and Samoa*. Wellington: Millwood Press.
- Waugh, D. R. & Hails, C. J. (1983) Foraging ecology of a tropical aerial feeding bird guild. *Ibis* **125**, 200-217.
- Wells, D. R. (1999) *Birds of the Thai-Malay peninsula*. London: Academic Press.
- West, J. (1988) Bird counts at the Chatham islands. *Notornis* **35**, 159-161.
- Wiles, G. J. (1998) Records of communal roosting in Mariana crows. *Wilson Bull.* **110**, 126-128.
- Williams, G. R. (1960) The birds of the Pitcairns Islands, Central South Pacific Ocean. *Ibis* **102**, 58-70.
- Wragg, G. M. (1995) The fossil birds of Henderson Island, Pitcairn Group: Natural turnover and human impact, a synopsis. *Biol. J. Linnean Soc.* **56**, 405-414.
- Zimmerman, D. A., Turner, D. A. & Pearson, D. J. (1996) *Birds of Kenya and northern Tanzania*. Princeton: Princeton University Press.
